# Supplementary material for: Sample size effects on the assessment of eukaryotic diversity and community structure in aquatic sediments using high-throughput sequencing
Source: PubMed Central journal article supplement (PMC6078945; doi:10.1038/s41598-018-30179-1), 2018-08-06
Supplement: 41598_2018_30179_MOESM1_ESM.pdf [file 41598_2018_30179_MOESM1_ESM.pdf]

## **Supplementary information**

### **Sample size effects on the assessment of eukaryotic diversity and community structure in aquatic sediments using high-throughput sequencing**

Nascimento, Francisco J.A.<sup>1,4</sup>; Lallias, Delphine<sup>2</sup>; Bik, Holly M<sup>3</sup>, Creer, Simon<sup>4</sup>

<sup>1</sup> Department of Ecology, Environment and Plant Sciences, Stockholm University

<sup>2</sup> GABI, INRA, AgroParisTech, Université Paris Saclay, 78350 Jouy-en-Josas, France.

<sup>3</sup> Department of Nematology, University of California Riverside, USA

<sup>4</sup> Molecular Ecology and Fisheries Genetics Laboratory, School of Biological Sciences, Bangor University, LL57 2UW, United Kingdom

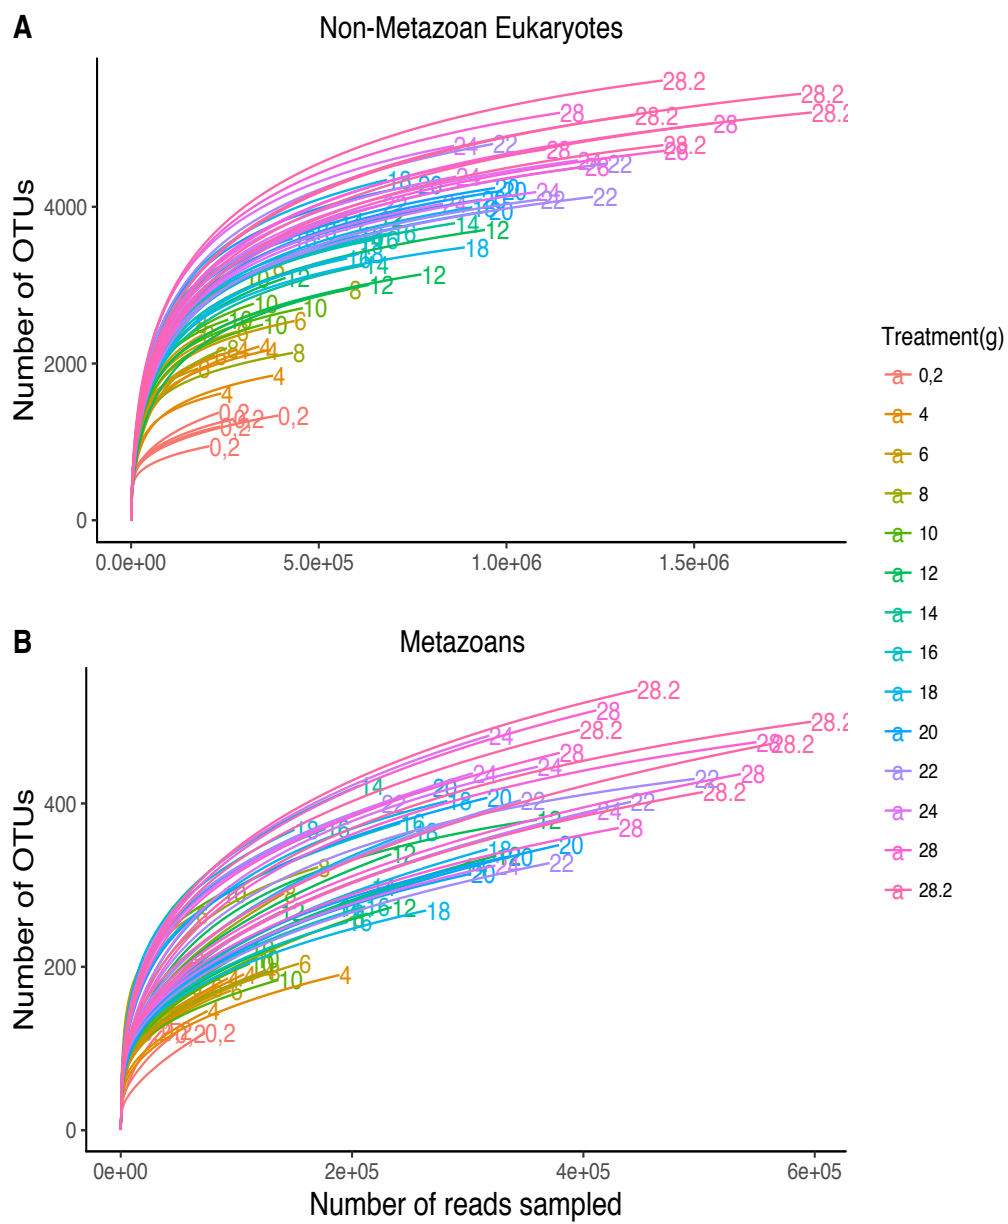

**Fig S1-** Rarefaction OTU curves for Non-Metazoan Eukaryotes (A) and Metazoans (B) in each sample. **Data represents 96% OTUs.**

## Non-Metazoan Eukaryotes A

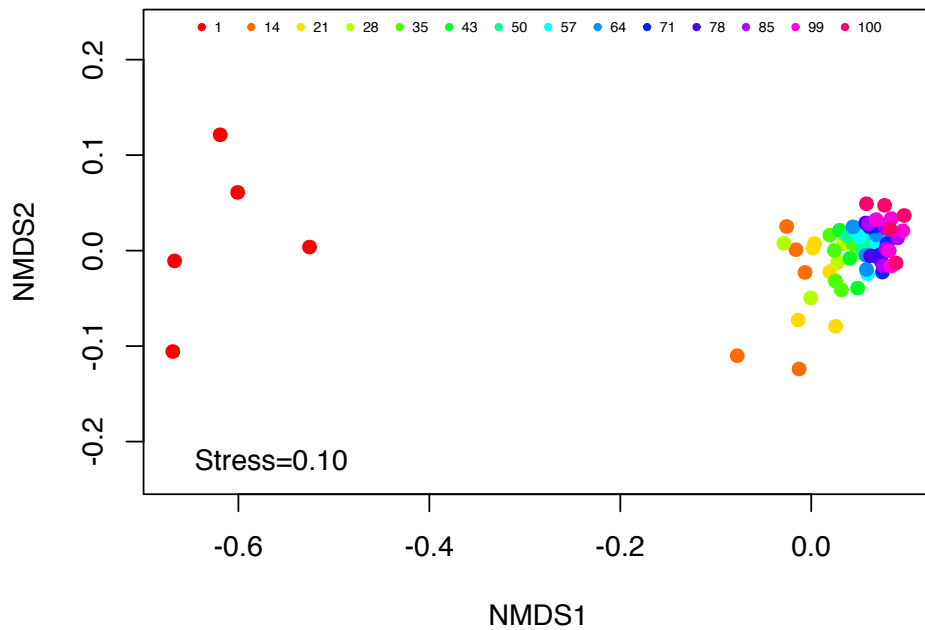

## Metazoans B

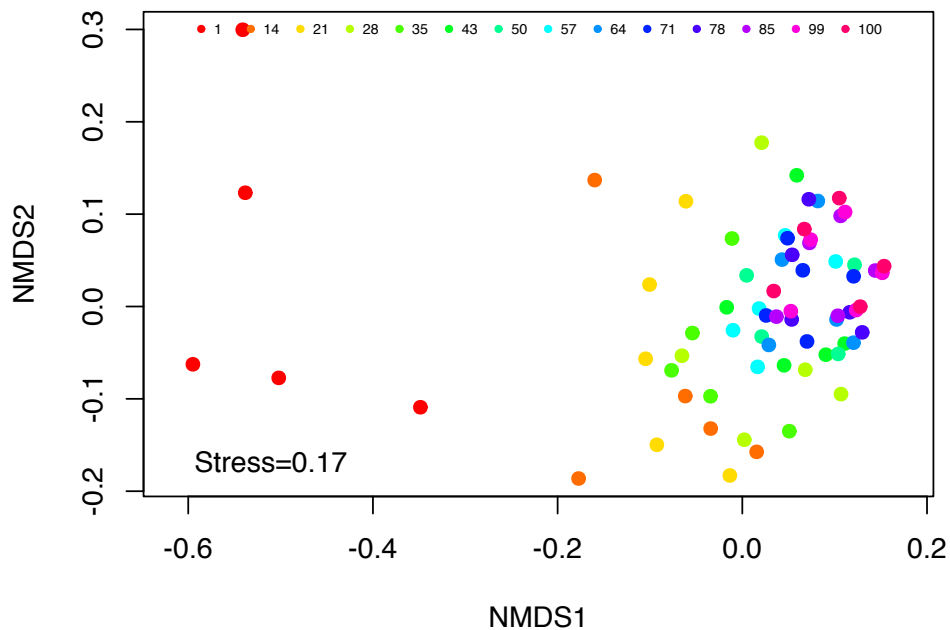

**Fig. S2-** Complete non-metric multidimensional scaling (NMDS) analysis of the Sørensen beta diversity matrix based on transformed OTU table for Non-Metazoan Eukaryotes (A) and Metazoans (B). **Data represents 96% OTUs.**

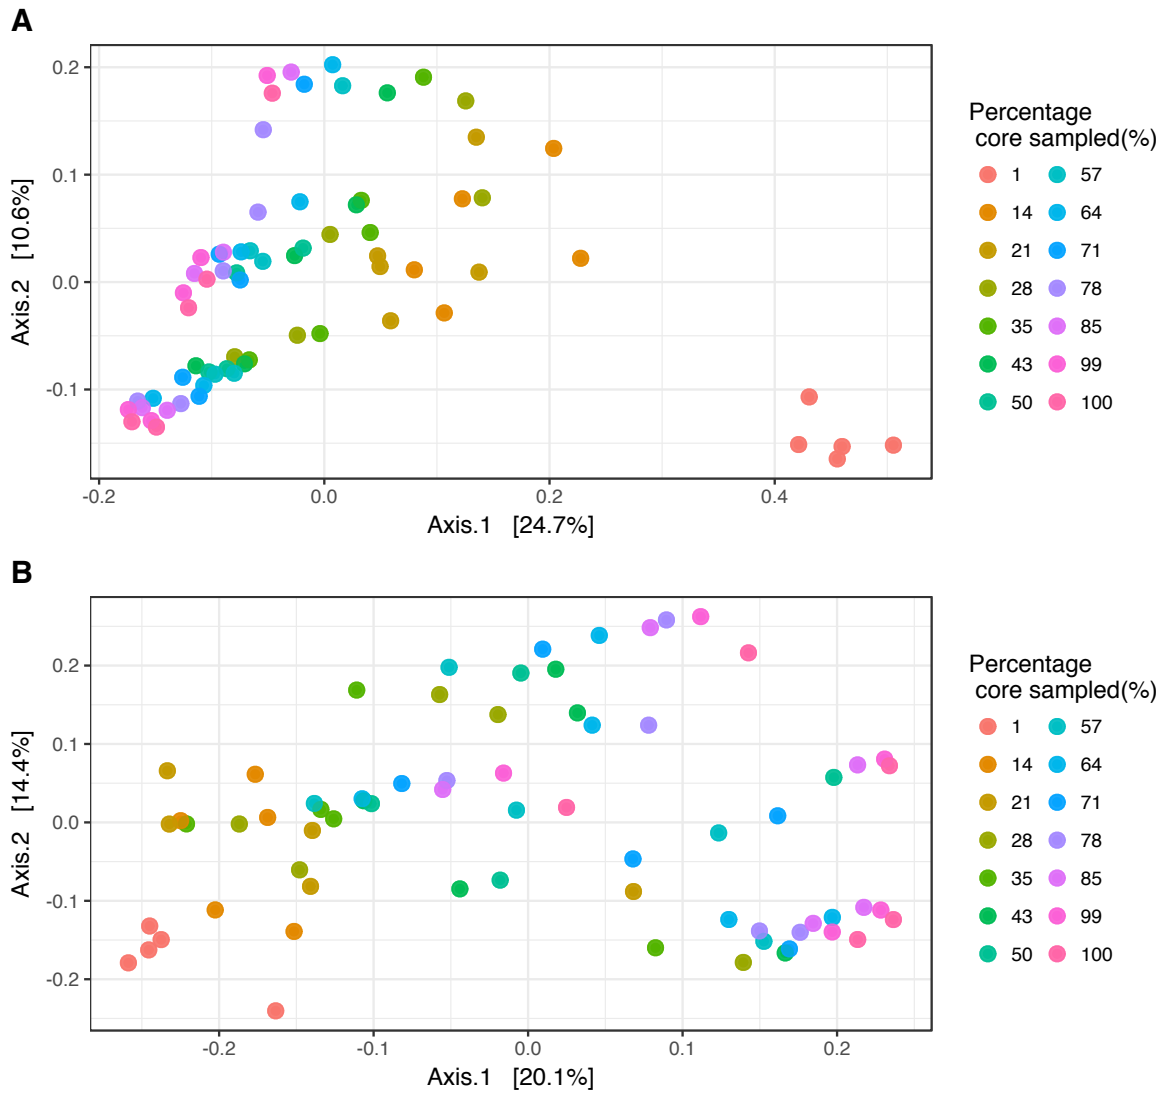

**Fig. S3-** Principal Coordinates Analysis (PCoA) analysis of the beta diversity matrix based on transformed OTU table for Non-Metazoan Eukaryotes (A) and Metazoans (B). **Data** represents 96% OTUs.

### A Non-Metazoan Eukaryotes

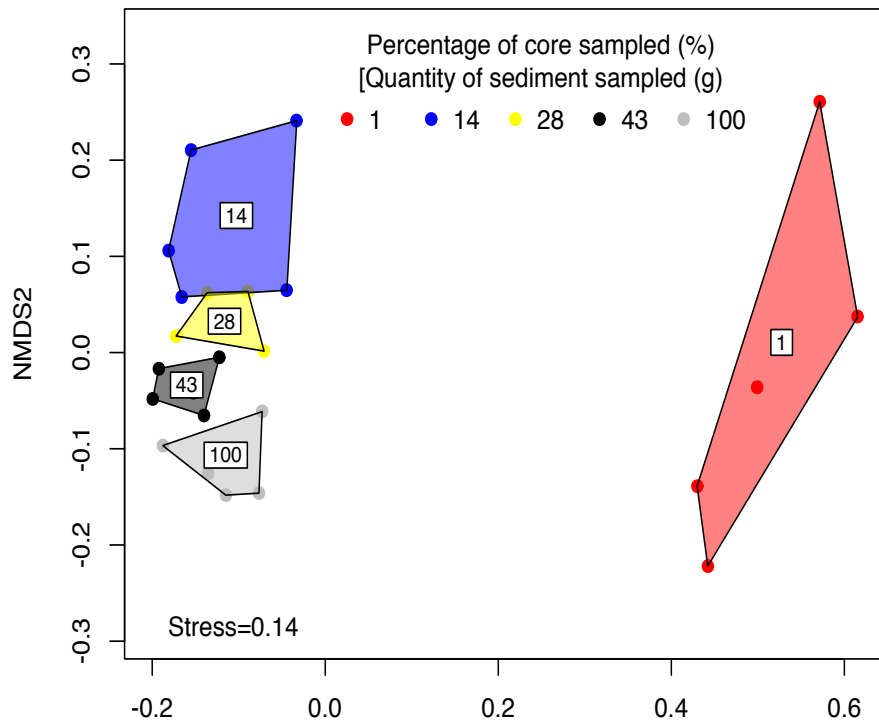

### B Metazoans

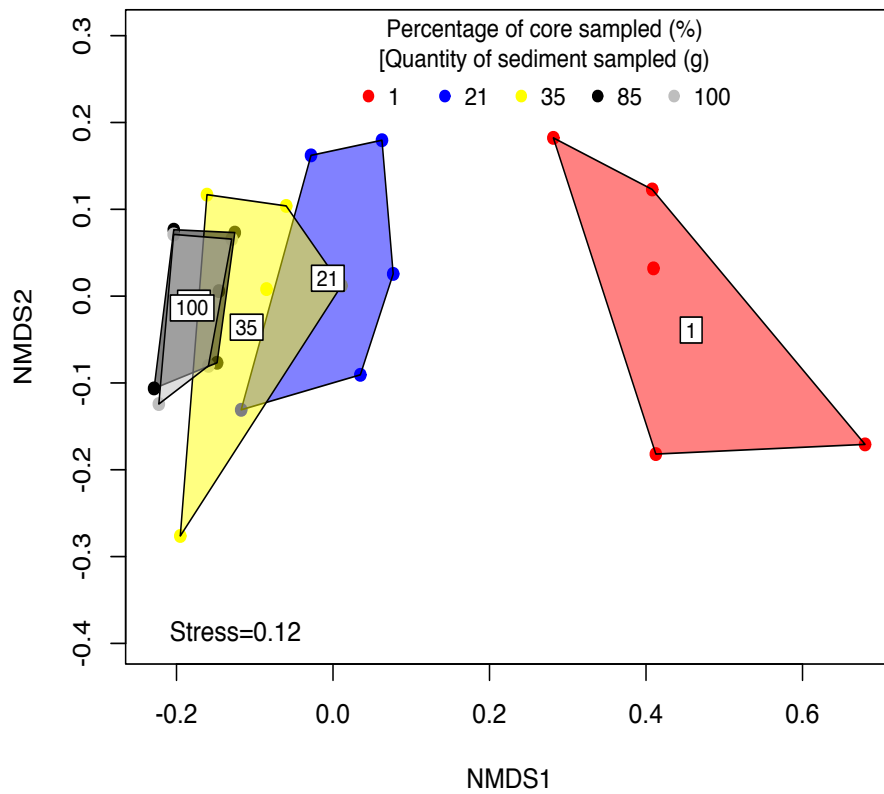

**Fig. S4-** Simplified non-metric multidimensional scaling (NMDS) analysis of the Sørensen beta-diversity matrix based on transformed 99% OTU table for Non-Metazoan Eukaryotes (A) and Metazoans (B). Differences between the different treatments and the 100% treatment stopped being significant at 57% of sediment analysed for Non-Metazoan Eukaryotes and in the 64% treatment for Metazoans (PERMANOVA, PERMDISP, see Table S3 in Supplementary information). For better visualization, the same treatments as in Fig 4 in the main text are presented. **Data represents 99% OTUS.**

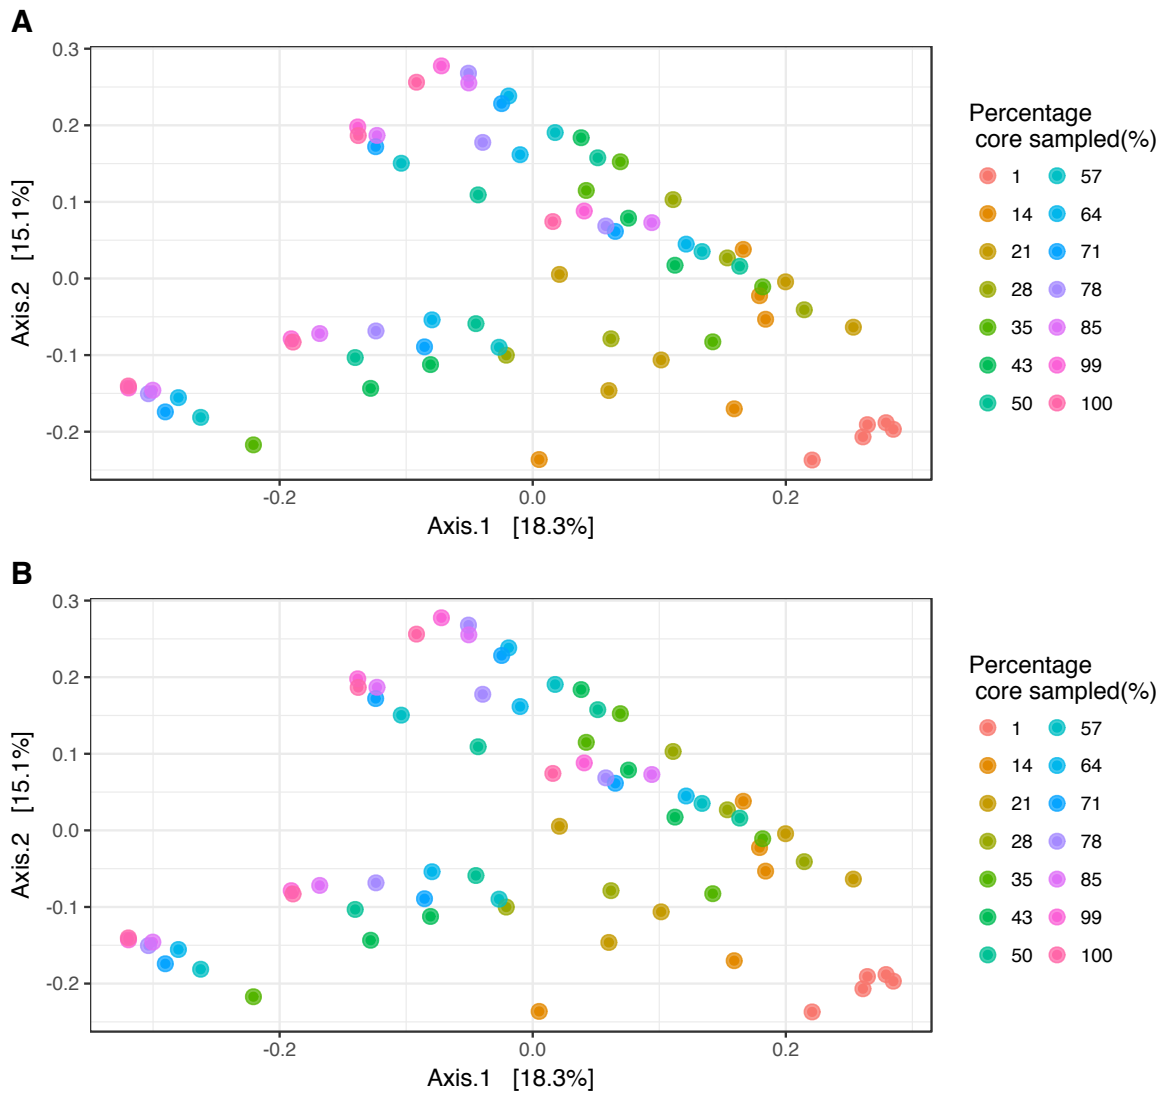

**Fig. S5** Principal Coordinates Analysis (PCoA) analysis of the beta diversity matrix based on transformed OTU table for Non-Metazoan Eukaryotes (A) and Metazoans (B). **Data** represents 99% OTUs.

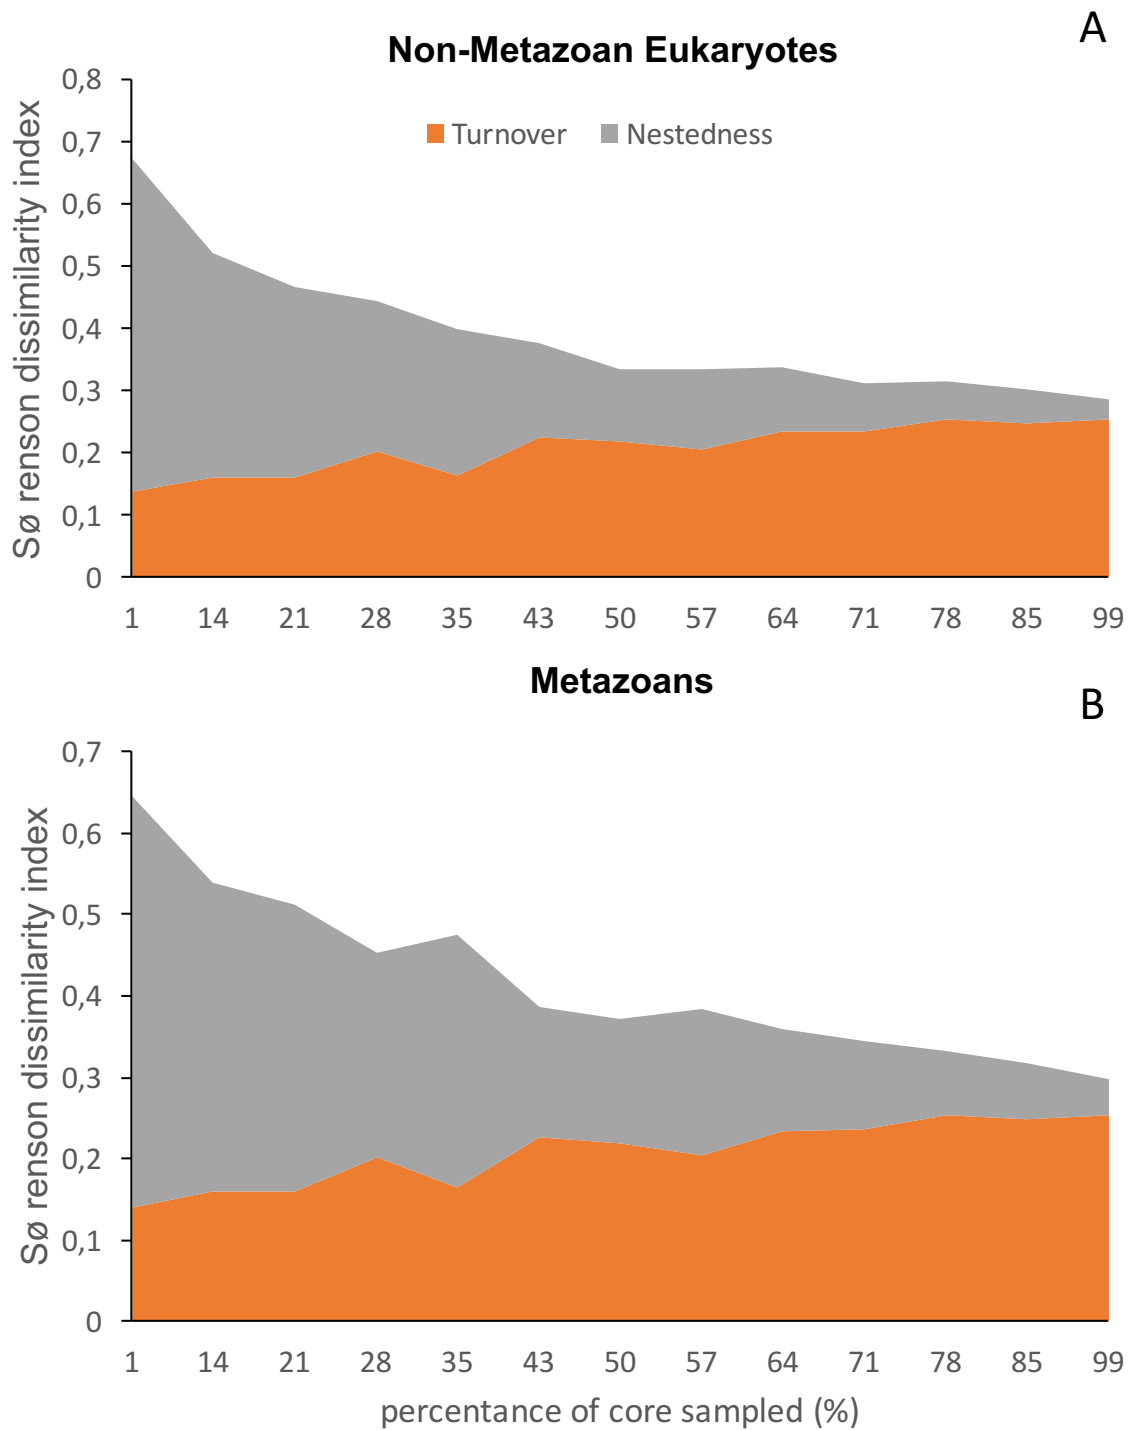

**Fig S6-** Partitioning of beta-diversity Sørensen dissimilarity index into dissimilarity due to turnover (orange) and nestedness (grey) for Non-Metazoan Eukaryotes (A) and Metazoans (B). **Data represents 96% OTUs.**



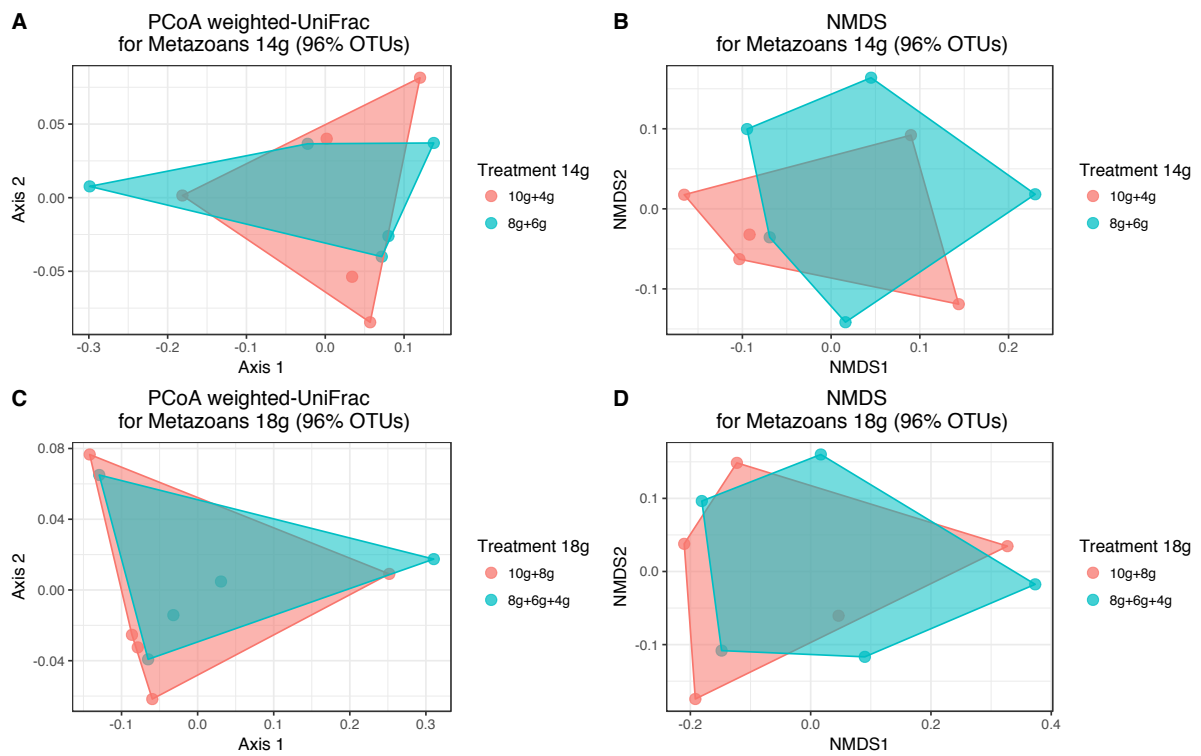

**Fig. S7-** Weighted PCoA (A and C) and NMDS (B and D) ordinations comparing two different strategies for obtaining 14g (10+4g vs 8+6g) and 18g (10+8g vs 8+6+4g) with the sample volumes used in this study. No statistical differences were seen between the two treatments (PERMANOVA,  $p=0.53$  and  $p=0.92$  for 14g and 18g, respectively)

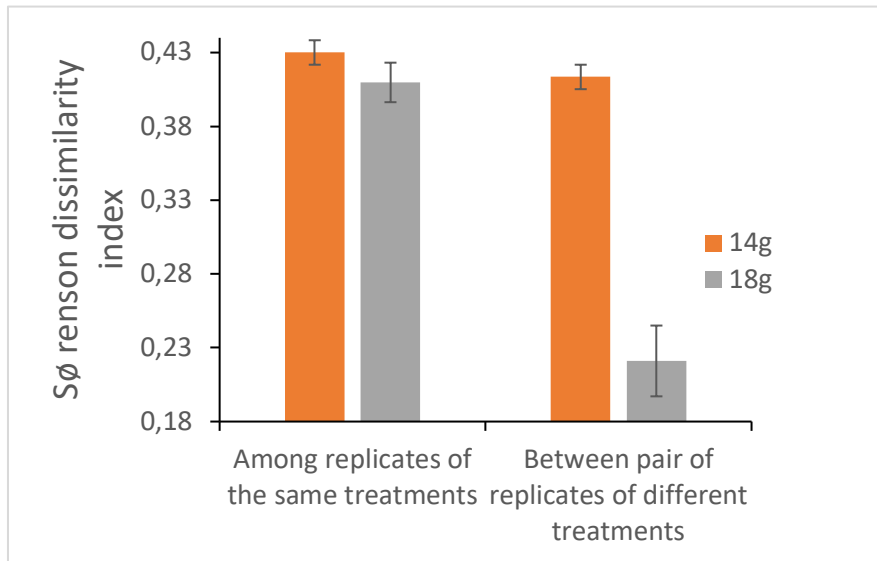

**Fig.S8-** Average Sørensen dissimilarity index among replicates of the 10g and distance between 10g vs 6+4g of the same replicate (based on data for Metazoans)

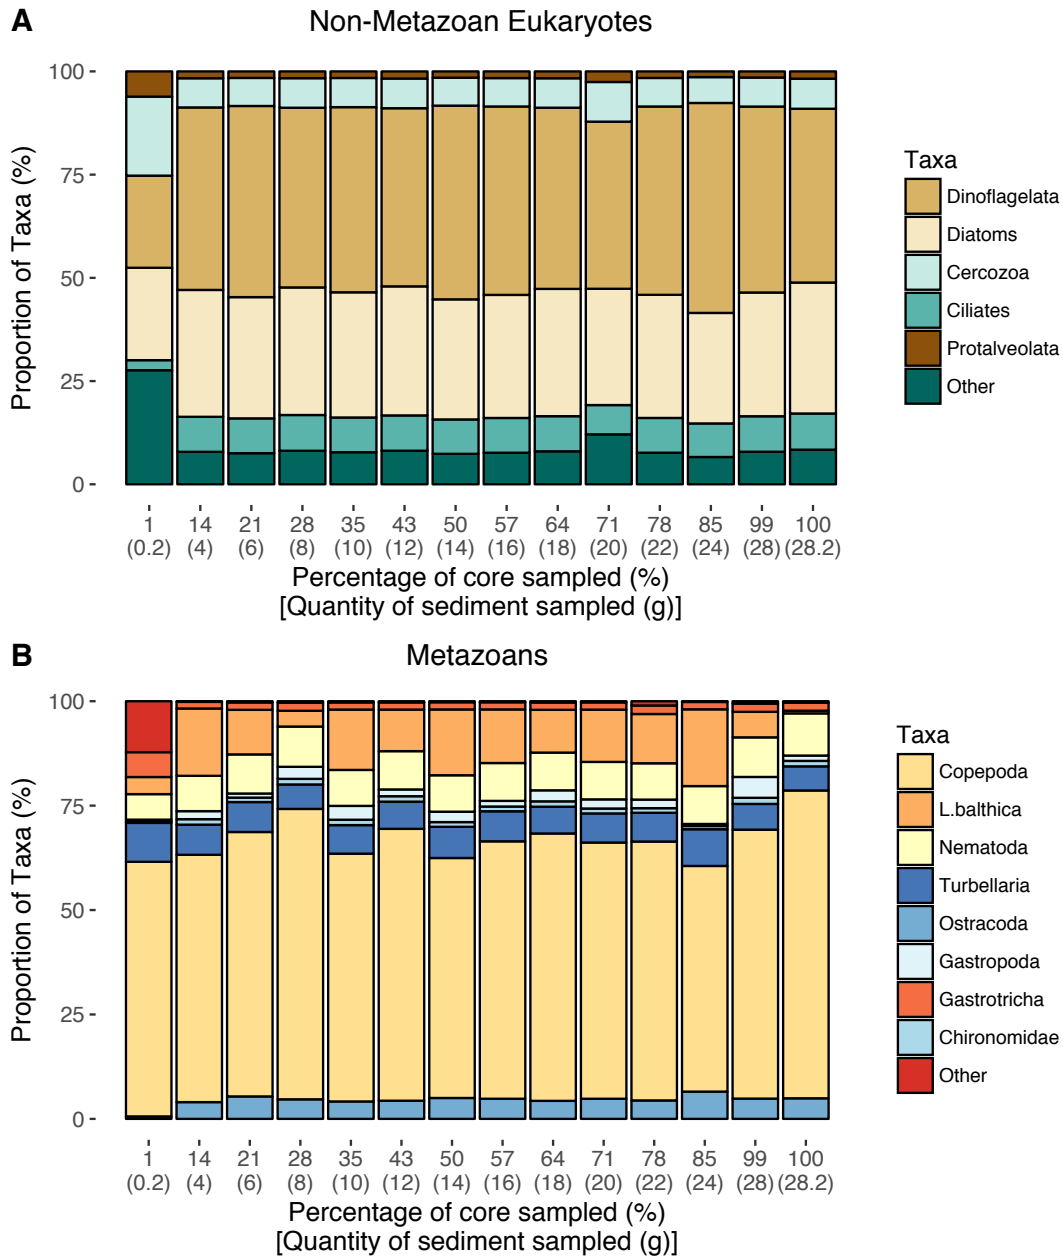

**Fig. S9** Proportion of the most abundant taxonomic groups in each treatment: A) Top five most abundant Non-Metazoan Eukaryotes in each treatment; B) Top nine most abundant Metazoan taxa in each treatment. **Data represents 99% OTUs.**

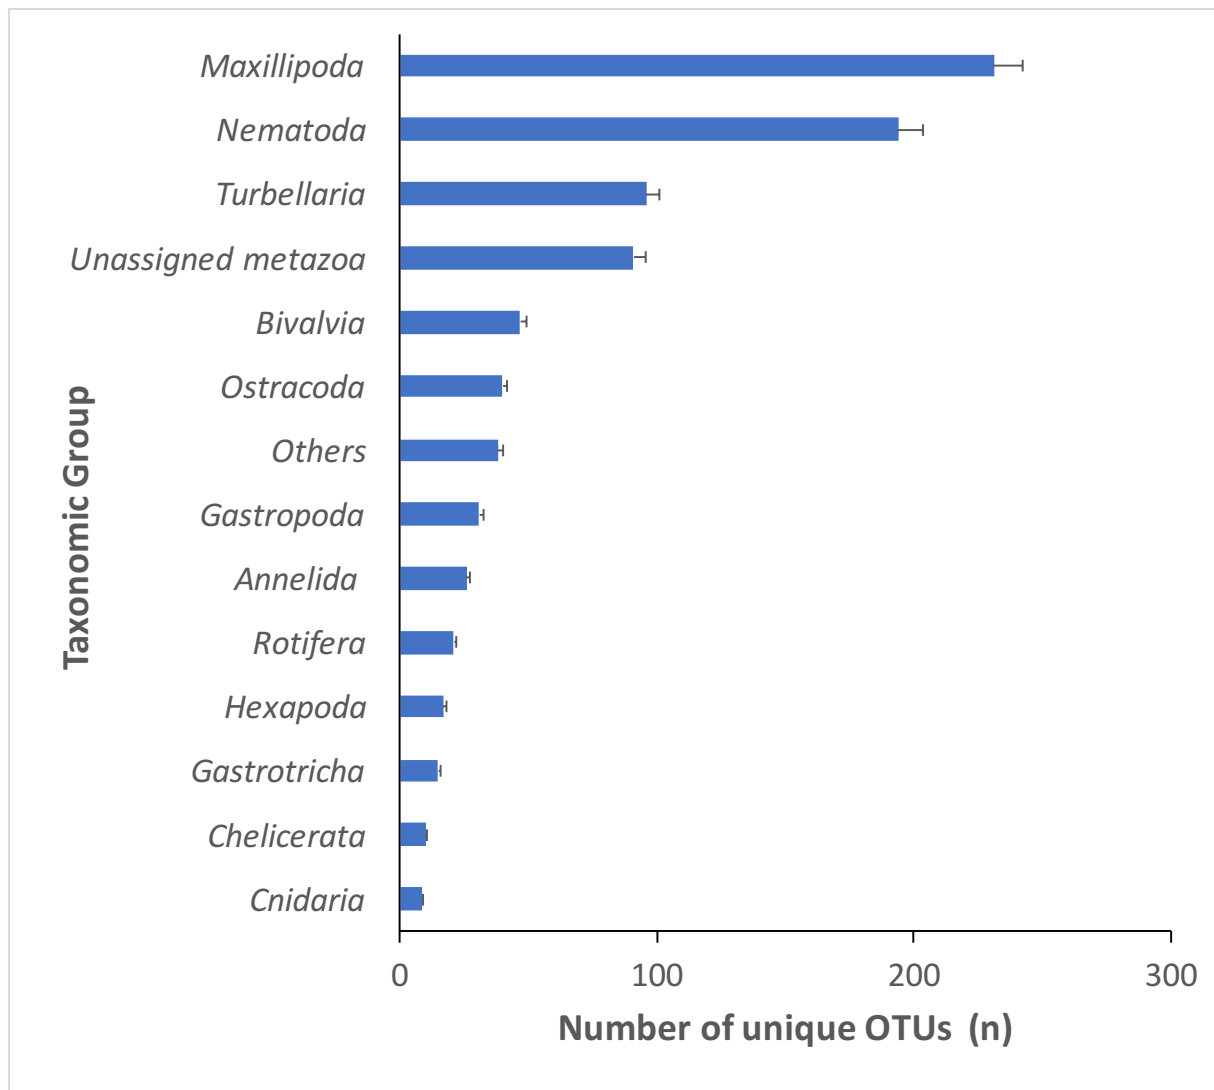

**Fig. S10-** Average number of unique OTUs per metazoan taxonomic group in the 100% (28.2 g) treatment. **Data represents 96% OTUs.**

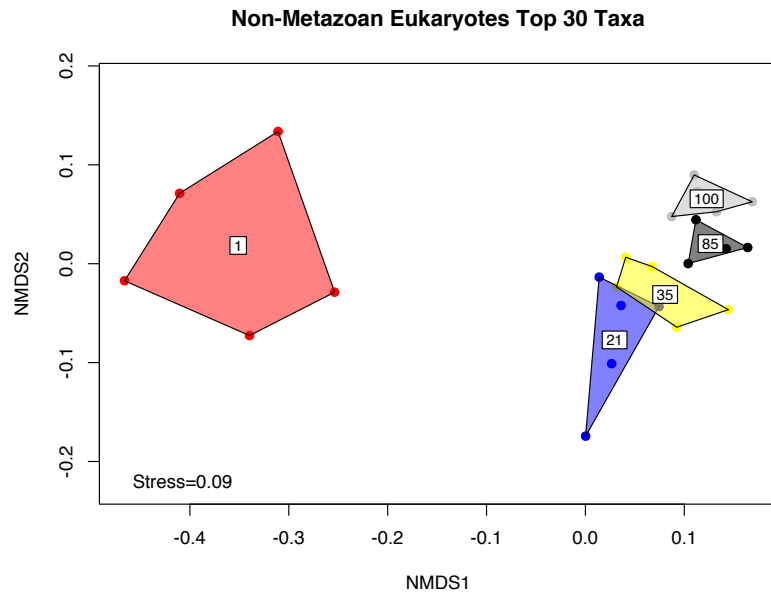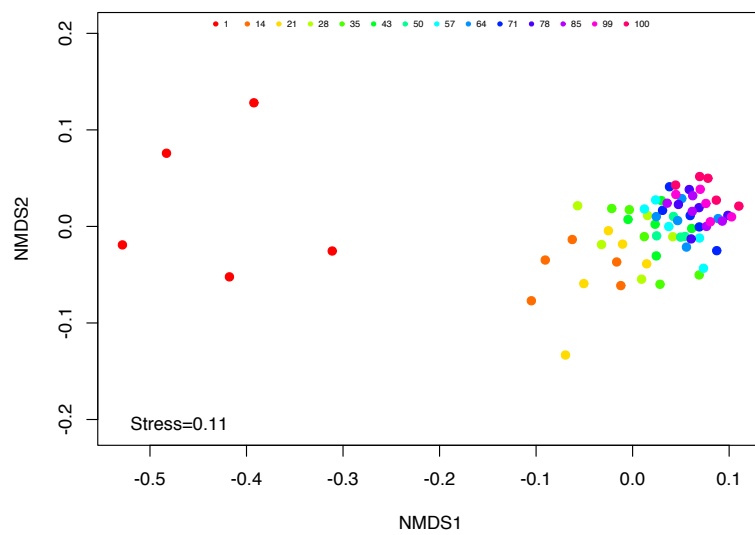

**Fig. S11-** Simplified (top) and complete (bottom) NMDS of the Sørensen beta diversity matrix based on transformed OTU table of the top 30 Non-Metazoan Eukaryote taxa. **Data based on 96% OTUs**

**Table S1-** Examples studies that assessed eukaryotic diversity and community structure in aquatic sediments using high-throughput sequencing, with information on sample volumes .

| Reference                                    | Target group                    | Habitat                | Methodology                        | sample volume (g) | main objective                                                                        |
|----------------------------------------------|---------------------------------|------------------------|------------------------------------|-------------------|---------------------------------------------------------------------------------------|
| Fonseca <i>et al.</i> 2010 <sup>7</sup>      | Metazoan meiofauna              | Intertidal sandy beach | Isolation of animals from sediment | NA                | Assess richness and patterns of diversity of metazoa                                  |
| Bik <i>et al.</i> 2012 <sup>8</sup>          | Meiofauna eukaryotes            | Abyssal sediments      | Both                               | 200               | Assess biodiversity of eukaryotes across bathymetric gradients                        |
| Stoeck <i>et al.</i> 2018 <sup>23</sup>      | Benthic ciliates                | Marine sediments       | eDNA directly from the sediment    | 6                 | Impacts of salmon sea cage farming                                                    |
| Zhao&Xu 2016 <sup>24</sup>                   | Benthic ciliates                | Deep-sea sediments     | eDNA directly from the sediment    | 0.3               | Evaluate diversity of benthic ciliates from deep-sea hydrothermal vents               |
| Pasulka <i>et al.</i> 2016 <sup>25</sup>     | Benthic eukaryotes              | Methane seep sediments | eDNA directly from the sediment    | 2                 | Factors that influence eukaryotic composition and distribution                        |
| Volant <i>et al.</i> 2016 <sup>26</sup>      | Benthic eukaryotes              | River sediments        | eDNA directly from the sediment    | 2                 | Characterize benthic eukaryotic diversity along a pollution gradient                  |
| Guardiola <i>et al.</i> 2016 <sup>27</sup>   | Benthic eukaryotes              | Deep-sea sediments     | eDNA directly from the sediment    | 10                | Spatial-temporal patterns of diversity in deep-sea sediment communities               |
| Pawlowski <i>et al.</i> 2014 <sup>28</sup>   | Benthic foraminifera            | Muddy sediments        | eDNA directly from the sediment    | 2                 | Response of foraminifera to environmental gradients                                   |
| Keeley <i>et al.</i> 2018 <sup>29</sup>      | Benthic eukaryotes and bacteria | Marine sediments       | eDNA directly from the sediment    | 2                 | Development of multi-trophic metabarcoding biotic index to assess aquaculture impacts |
| Laroche <i>et al.</i> 2018 <sup>30</sup>     | Benthic eukaryotes and bacteria | Marine sediments       | eDNA directly from the sediment    | 2                 | Impacts of offshore and oil and gas drilling operations                               |
| Lejzerowicz <i>et al.</i> 2015 <sup>31</sup> | Benthic metazoans               | Muddy sediments        | eDNA directly from the sediment    | 2                 | Compare morphological and eDNA/RNA based inventories of metazoans                     |
| Chariton <i>et al.</i> 2015 <sup>40</sup>    | Benthic eukaryotes              | Estuarine sediments    | eDNA directly from the sediment    | 1.5               | Benthic eukaryotic diversity of estuaries                                             |
| Pochon <i>et al.</i> 2015 <sup>41</sup>      | Benthic Foraminifera            | Marine sediments       | Isolation of animals from sediment | 4                 | Impacts of salmon sea cage farming                                                    |
| Laroche <i>et al.</i> 2016 <sup>42</sup>     | Benthic Foraminifera            | Marine sediments       | eDNA directly from the sediment    | 2                 | Impacts of offshore and oil and gas drilling operations                               |
| Lallias <i>et al.</i> 2015 <sup>67</sup>     | Metazoan meiofauna              | Estuarine sediments    | Isolation of animals from sediment | NA                | Abiotic factors structuring meiofauna diversity in estuaries                          |
| Aguilar <i>et al.</i> 2016 <sup>68</sup>     | Benthic eukaryotes              | Sediment tailing ponds | eDNA directly from the sediment    | 0.1               | Microbial eukaryotic diversity in oil sands tailings ponds                            |

|                                           |                      |                         |                                    |                |                                                              |
|-------------------------------------------|----------------------|-------------------------|------------------------------------|----------------|--------------------------------------------------------------|
| Chariton <i>et al.</i> 2014 <sup>69</sup> | Benthic eukaryotes   | Muddy sediments         | eDNA directly from the sediment    | 3              | Responses of benthic eukaryotes to exposure to triclosan     |
| Fonseca <i>et al.</i> 2017 <sup>70</sup>  | Metazoan meiofauna   | Antarctic sediments     | Isolation of animals from sediment | NA             | Investigate biodiversity in Antarctic sediments              |
| Lecroq <i>et al.</i> 2011 <sup>71</sup>   | Benthic foraminifera | Deep-sea sediments      | eDNA directly from the sediment    | 0.5 (5g total) | Examine the richness of benthic deep-sea foraminifera        |
| Lanzén <i>et al.</i> 2016 <sup>72</sup>   | Benthic eukaryotes   | Marine sediments        | eDNA directly from the sediment    | 5              | Environmental monitoring of offshore oil-drilling activities |
| Bahdury&Austen 2010 <sup>73</sup>         | Benthic nematodes    | Surface sandy sediments | eDNA directly from the sediment    | 0.5            | Test existing taxonomy databases                             |
| Smith <i>et al.</i> 2016 <sup>74</sup>    | Dinoflagellate       | Algal beds              | eDNA directly from the sediment    | 0.5            | Biodiversity assessment of benthic-epiphytic dinoflagellates |

**Table S2-** Previous studies on the effects of sample size on diversity with details on the investigated taxa, used sample sizes, and directionality of the effects found

| Reference                              | Target group            | Samples sizes tested (g)                          | Marker      | Effects on diversity                                                                                                     |
|----------------------------------------|-------------------------|---------------------------------------------------|-------------|--------------------------------------------------------------------------------------------------------------------------|
| Kang & Mills 2006 <sup>17</sup>        | Soil bacteria           | 0.01, 0.1,0.25, 1, 10                             | 16S         | Effects of sample size but no difference between 0.25 and 10g                                                            |
| Penton <i>et al.</i> 2016              | Soil bacteria and fungi | 0.25, 1,5, 10                                     | 16S and 28S | Effects of sample size. 10g with highest estimates of evenness, diversity and richness                                   |
| Ellingsøe & Johnsen 2002 <sup>29</sup> | Soil bacteria           | 0.01, 0.1, 1.0, 10                                | 16S         | Effects of sample size but no difference between 1 and 10g                                                               |
| Brannock & Halanych 2015 <sup>12</sup> | Meiofauna               | 0.3,5, 10 and animals elutriated from 200 and 400 | 18S         | No effect of sample size on alpha-diversity; differences in beta-diversity between elutriated and non-elutriated samples |

**Table S3-** Summary of statistical tests comparing the different treatments with the treatment comprising 100% of the sampled area (based on 99% OTUs). One-way parametric analysis of variance ANOVA was used to test for the effect of sample volume. P values smaller than 0.05 indicate a significant effect of sample volume. Pairwise comparisons between the 100% treatment and the other 13 treatments were performed with the Tukey HSD test. Effects of sample volume on beta-diversity differences among treatments were tested with PERMANOVA. Differences between the 100% treatment and the other 13 treatments for beta-diversity was tested with PERMDISP. The treatment with the highest sample volume still different from the treatment comprising 100% of the sampled area in each of the variable is presented in the last column of the table. **Data represents 99% OTUs.**



| <b>Variable</b>                                | <b>Community</b>               | <b>ANOVA<br/>F<br/>statistics</b> | <b>ANOVA<br/>p value<br/>ANOVA</b> | <b>Highest % of core sampled<br/>significantly different from<br/>the 100% treatment</b> |
|------------------------------------------------|--------------------------------|-----------------------------------|------------------------------------|------------------------------------------------------------------------------------------|
| <b>Percentage<br/>of<br/>metazoan<br/>taxa</b> | NA                             | 3.1                               | < 0.001                            | 1% (0.2g)                                                                                |
| <b>Number of<br/>unique<br/>OTUs</b>           | Non-<br>Metazoan<br>Eukaryotes | 28                                | < 0.001                            | 78% (22g)                                                                                |
|                                                | Metazoans                      | 23                                | < 0.001                            | 64% (18g)                                                                                |
| <b>Margalef<br/>index</b>                      | Non-<br>Metazoan<br>Eukaryotes | 29                                | < 0.001                            | 71% (20g)                                                                                |
|                                                | Metazoans                      | 24                                | < 0.001                            | 57% (16g)                                                                                |
| <b>Chao1<br/>richness</b>                      | Non-<br>Metazoan<br>Eukaryotes | 55                                | < 0.001                            | 78% (22g)                                                                                |
|                                                | Metazoans                      | 15                                | < 0.001                            | 57% (16g)                                                                                |

|                            |                                | <b>PERMA<br/>NOVA<br/>F<br/>Statists</b> | <b>PERMA<br/>NOVA<br/>p value</b> | <b>Lowest % of core sampled<br/>significantly different from<br/>the 100% treatment</b> |
|----------------------------|--------------------------------|------------------------------------------|-----------------------------------|-----------------------------------------------------------------------------------------|
| <b>Beta-<br/>Diversity</b> | Non-<br>Metazoan<br>Eukaryotes | 1.6                                      | <0.001                            | 57% (16g)                                                                               |
|                            | Metazoans                      | 1.2                                      | 0.024                             | 64% (18g)                                                                               |

**Table S4-** Number of sequence reads for each of the 25 analysed samples before and after demultiplexing and sequence quality filtering

| Replicate | Sample volume | Raw sequences reads | N of demultiplexed and filtered sequence reads |
|-----------|---------------|---------------------|------------------------------------------------|
| 0.2g-A    | 0.2g          | 234 451             | 229 408                                        |
| 0.2g-B    | 0.2g          | 392 771             | 384 917                                        |
| 0.2g-C    | 0.2g          | 273 938             | 268 099                                        |
| 0.2g-D    | 0.2g          | 237 462             | 232 721                                        |
| 0.2g-E    | 0.2g          | 209 164             | 205 334                                        |
| 4g-A      | 4g            | 361 511             | 355 290                                        |
| 4g-B      | 4g            | 342 117             | 336 490                                        |
| 4g-C      | 4g            | 283 206             | 278 231                                        |
| 4g-D      | 4g            | 240 372             | 236 532                                        |
| 4g-E      | 4g            | 379 050             | 373 392                                        |
| 6g-A      | 6g            | 281 583             | 276 898                                        |
| 6g-B      | 6g            | 190 847             | 187 496                                        |
| 6g-C      | 6g            | 178 641             | 175 437                                        |
| 6g-D      | 6g            | 436 053             | 429 110                                        |
| 6g-E      | 6g            | 223 693             | 219 840                                        |
| 8g-A      | 8g            | 582 388             | 572017                                         |
| 8g-B      | 8g            | 432 078             | 425 029                                        |
| 8g-C      | 8g            | 378 646             | 371 463                                        |
| 8g-D      | 8g            | 171 791             | 168 672                                        |
| 8g-E      | 8g            | 256 068             | 252 215                                        |
| 10g-A     | 10g           | 327 693             | 321 773                                        |
| 10g-B     | 10g           | 457 717             | 449 949                                        |
| 10g-C     | 10g           | 304 376             | 298 608                                        |
| 10g-D     | 10g           | 259 511             | 255 074                                        |
| 10g-E     | 10g           | 352 061             | 345 941                                        |

**Table S5-** Total number of sequences for each of the additional sample volumes based on combined samples (see Methods)

| Replicate | Replicate combination | Total number of sequence reads |
|-----------|-----------------------|--------------------------------|
| 12g-A     | 8g-A + 4g-A           | 9.4E+05                        |
| 12g-B     | 8g-B + 4g-B           | 7.7E+05                        |
| 12g-C     | 8g-C + 4g-C           | 6.6E+05                        |
| 12g-D     | 8g-D + 4g-D           | 4.1E+05                        |
| 12g-E     | 8g-E + 4g-E           | 6.3E+05                        |
| 14g-A     | 8g-A + 6g-A           | 8.6E+05                        |
| 14g-B     | 8g-B + 6g-B           | 6.2E+05                        |
| 14g-C     | 8g-C + 6g-C           | 5.6E+05                        |
| 14g-D     | 8g-D + 6g-D           | 6.1E+05                        |
| 14g-E     | 8g-E + 6g-E           | 4.8E+05                        |
| 16g-A     | 10g-A + 6g-A          | 6.1E+05                        |
| 16g-B     | 10g-B + 6g-B          | 6.5E+05                        |
| 16g-C     | 10g-C + 6g-C          | 4.8E+05                        |
| 16g-D     | 10g-D + 6g-D          | 6.9E+05                        |
| 16g-E     | 10g-E + 6g-E          | 5.8E+05                        |
| 18g-A     | 10g-A + 8g-A          | 9.1E+05                        |
| 18g-B     | 10g-B + 8g-B          | 8.9E+05                        |
| 18g-C     | 10g-C + 8g-C          | 6.8E+05                        |
| 18g-D     | 10g-D + 8g-D          | 4.3E+05                        |
| 18g-E     | 10g-E + 8g-E          | 6.1E+05                        |
| 20g-A     | 10g-A + 6g-A + 4g-A   | 9.7E+05                        |
| 20g-B     | 10g-B + 6g-B + 4g-B   | 9.9E+05                        |
| 20g-C     | 10g-C + 6g-C + 4g-C   | 7.7E+05                        |
| 20g-D     | 10g-D + 6g-D + 4g-D   | 9.3E+05                        |
| 20g-E     | 10g-E + 6g-E + 4g-E   | 9.5E+05                        |
| 22g-A     | 10g-A + 8g-A + 4g-A   | 1.3E+06                        |
| 22g-B     | 10g-B + 8g-B + 4g-B   | 1.2E+06                        |
| 22g-C     | 10g-C + 8g-C + 4g-C   | 9.6E+05                        |
| 22g-D     | 10g-D + 8g-D + 4g-D   | 6.7E+05                        |
| 22g-E     | 10g-E + 8g-E + 4g-E   | 1.1E+06                        |
| 24g-A     | 10g-A + 8g-A + 6g-A   | 1.2E+06                        |
| 24g-B     | 10g-B + 8g-B + 6g-B   | 1.1E+06                        |
| 24g-C     | 10g-C + 8g-C + 6g-C   | 8.6E+05                        |

|         |                                     |         |
|---------|-------------------------------------|---------|
| 24g-D   | 10g-D + 8g-D + 6g-D                 | 8.7E+05 |
| 24g-E   | 10g-E + 8g-E + 6g-E                 | 8.3E+05 |
| 28g-A   | 10g-A + 8g-A + 6g-A + 4g-A          | 1.6E+06 |
| 28g-B   | 10g-B + 8g-B + 6g-B + 4g-B          | 1.4E+06 |
| 28g-C   | 10g-C + 8g-C + 6g-C + 4g-C          | 1.1E+06 |
| 28g-D   | 10g-D + 8g-D + 6g-D + 4g-D          | 1.1E+06 |
| 28g-E   | 10g-E + 8g-E + 6g-E + 4g-E          | 1.2E+06 |
| 28.2g-A | 10g-A + 8g-A + 6g-A + 4g-A + 0.2g-A | 1.8E+06 |
| 28.2g-B | 10g-B + 8g-B + 6g-B + 4g-B + 0.2g-B | 1.8E+06 |
| 28.2g-C | 10g-C + 8g-C + 6g-C + 4g-C + 0.2g-C | 1.4E+06 |
| 28.2g-D | 10g-D + 8g-D + 6g-D + 4g-D + 0.2g-D | 1.3E+06 |
| 28.2g-E | 10g-E + 8g-E + 6g-E + 4g-E + 0.2g-E | 1.4E+06 |
